# Supplementary material for: Control of tick infestations and pathogen prevalence in cattle and sheep farms vaccinated with the recombinant Subolesin-Major Surface Protein 1a chimeric antigen
Source: PubMed Central journal article supplement (PMC3896746; doi:10.1186/1756-3305-7-10), 2014-01-08
Supplement: 1756-3305-7-10-S1.pdf [file 1756-3305-7-10-S1.pdf]

## Supplementary figures.

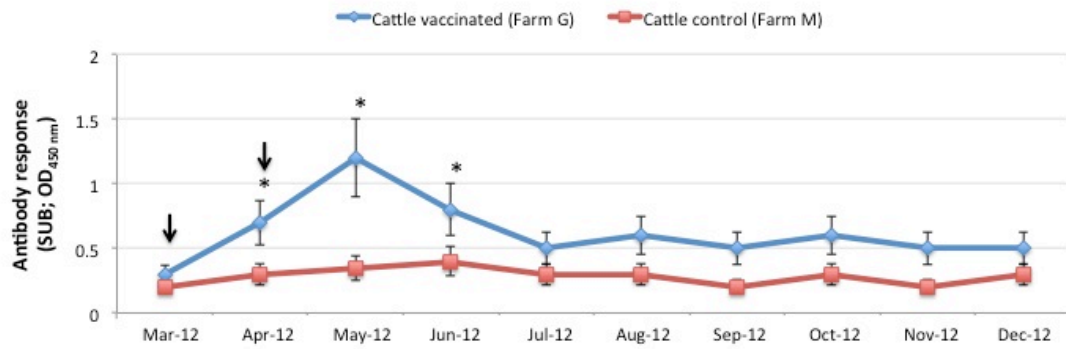

Figure S1

**Figure S1. Antibody response in cattle.** Serum antibody titers to recombinant SUB were determined by ELISA in cattle. Antibody titers were expressed as the OD<sub>450nm</sub> value for the 1:1000 serum dilution, represented as Ave±SD and compared between vaccinated and control animals using an ANOVA test (\*p<0.05). The time of immunization shots are indicated with arrows.

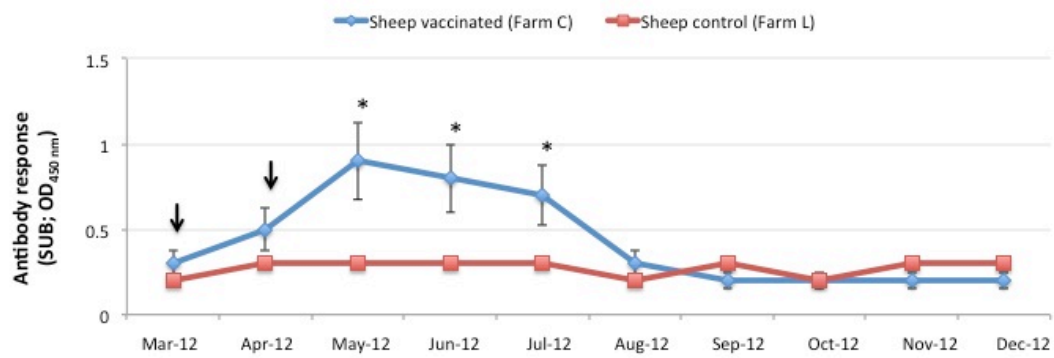

Figure S2

**Figure S2. Antibody response in sheep.** Serum antibody titers to recombinant SUB were determined by ELISA in sheep. Antibody titers were expressed as the OD<sub>450nm</sub> value for the 1:1000 serum dilution, represented as Ave±SD and compared between vaccinated and control animals using an ANOVA test (\*p<0.05). The time of immunization shots are indicated with arrows.

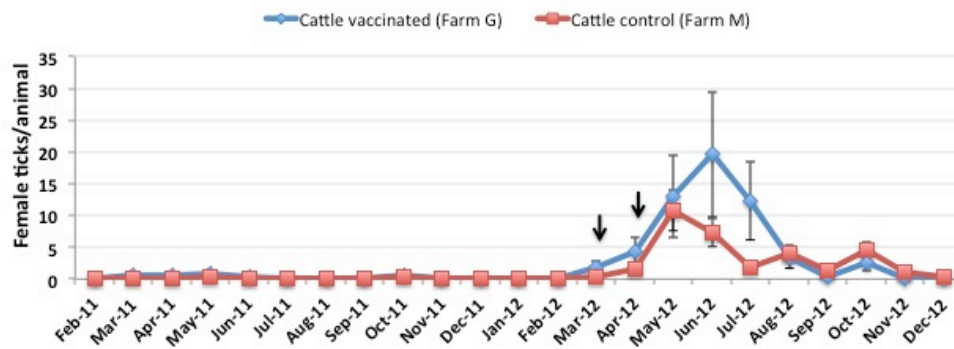

Figure S3

**Figure S3. Tick infestations in cattle.** Female ticks found on animals in both vaccinated and control cattle farms were counted and stored in 70% ethanol. Tick infestations (female ticks/animal) were represented as Ave±SD and compared between vaccinated and control animals using an ANOVA test ( $p>0.05$ ). The time of immunization shots are indicated with arrows.

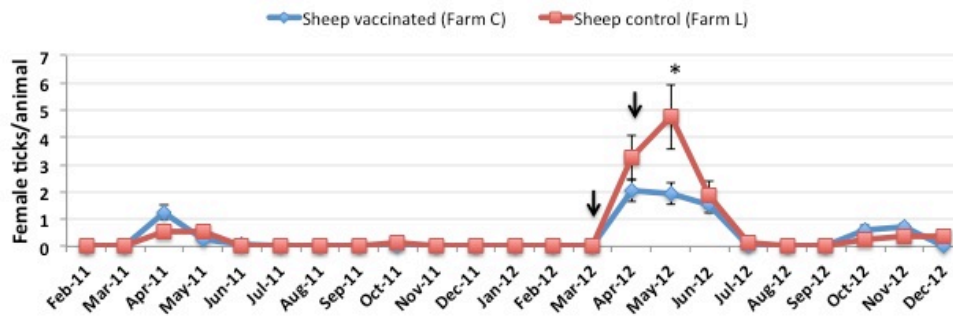

Figure S4

**Figure S4. Tick infestations in sheep.** Female ticks found on animals in both vaccinated and control sheep farms were counted and stored in 70% ethanol. Tick infestations (female ticks/animal) were represented as Ave±SD and compared between vaccinated and control animals using an ANOVA test (\*p<0.05). The time of immunization shots are indicated with arrows.

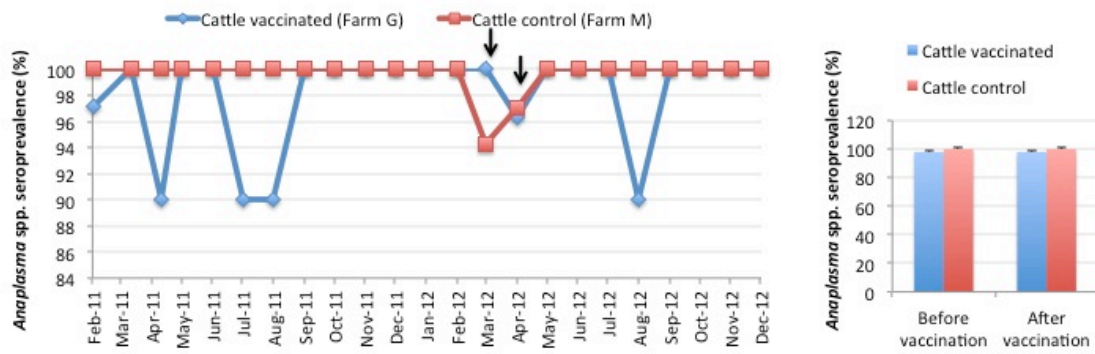

Figure S5

**Figure S5. Seroprevalence of *Anaplasma* spp. in cattle.** The seroprevalence (%) of *Anaplasma* spp. in vaccinated and control cattle was determined by ELISA, represented as  $Ave \pm SD$  and compared between cattle in the vaccinated farm before and after vaccination and between vaccinated and control cattle by Student's t-test with unequal variance ( $p > 0.05$ ). The time of immunization shots are indicated with arrows.

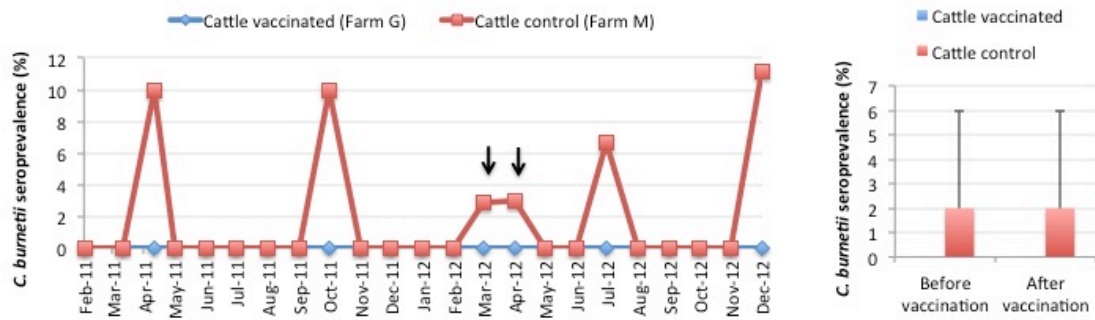

Figure S6

**Figure S6. Seroprevalence of *C. burnetii* in cattle.** The seroprevalence (%) of *C. burnetii* in vaccinated and control cattle was determined by ELISA, represented as Ave±SD and compared between cattle in the vaccinated farm before and after vaccination and between vaccinated and control cattle by Student's t-test with unequal variance ( $p>0.05$ ). The time of immunization shots are indicated with arrows.

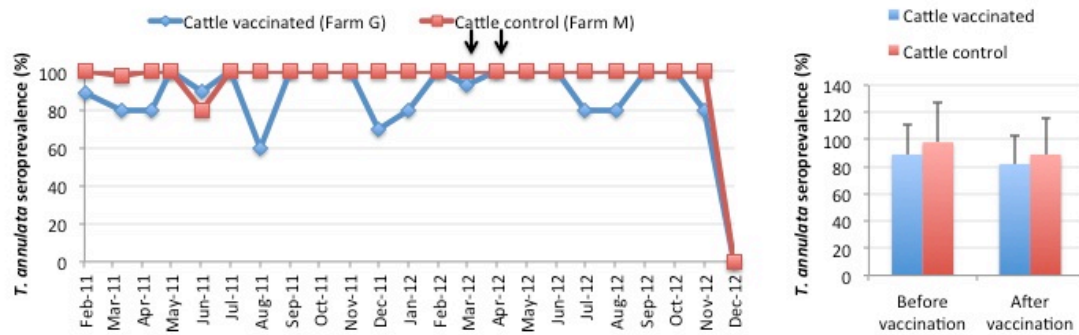

Figure S7

**Figure S7. Seroprevalence of *T. annulata* in cattle.** The seroprevalence (%) of *T. annulata* in vaccinated and control cattle was determined by immunofluorescence, represented as Ave±SD and compared between cattle in the vaccinated farm before and after vaccination and between vaccinated and control cattle by Student's t-test with unequal variance ( $p>0.05$ ). The time of immunization shots are indicated with arrows.

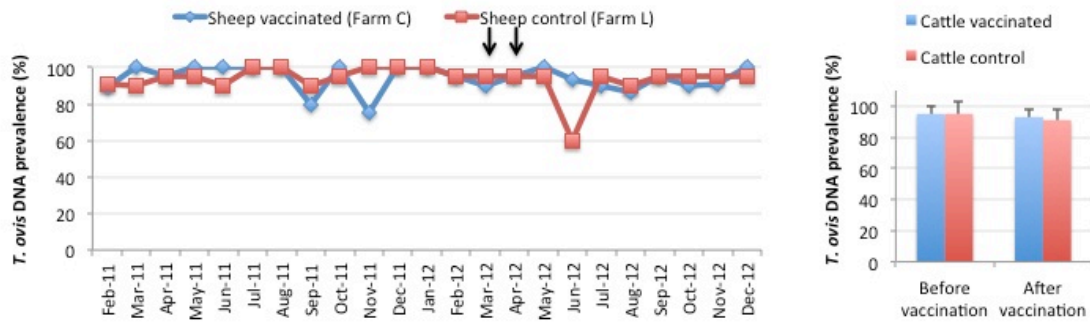

Figure S8

**Figure S8. DNA prevalence of *T. ovis* in sheep.** The DNA prevalence (%) for *T. ovis* in vaccinated and control sheep was determined by PCR, represented as Ave±SD and compared between sheep in the vaccinated farm before and after vaccination and between vaccinated and control sheep by Student's t-test with unequal variance ( $p>0.05$ ). The time of immunization shots are indicated with arrows.
